# Supplementary material
Source: PubMed Central journal article supplement (PMC1751331)

Supplemental Figure 1; Ems-McClung, Hertzler, Zhang, Miller, and Walczak

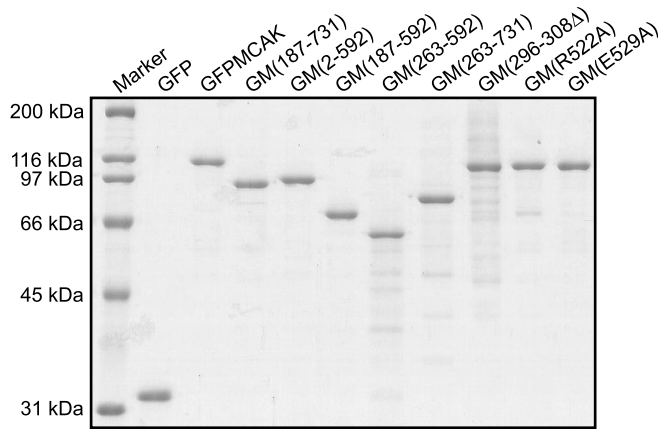

Supplement: mbc_E06-08-0724_1.pdf [file mbc_E06-08-0724_1.pdf]

Supplemental Figure 5; Ems-McClung, Hertzler, Zhang, Miller and Walczak

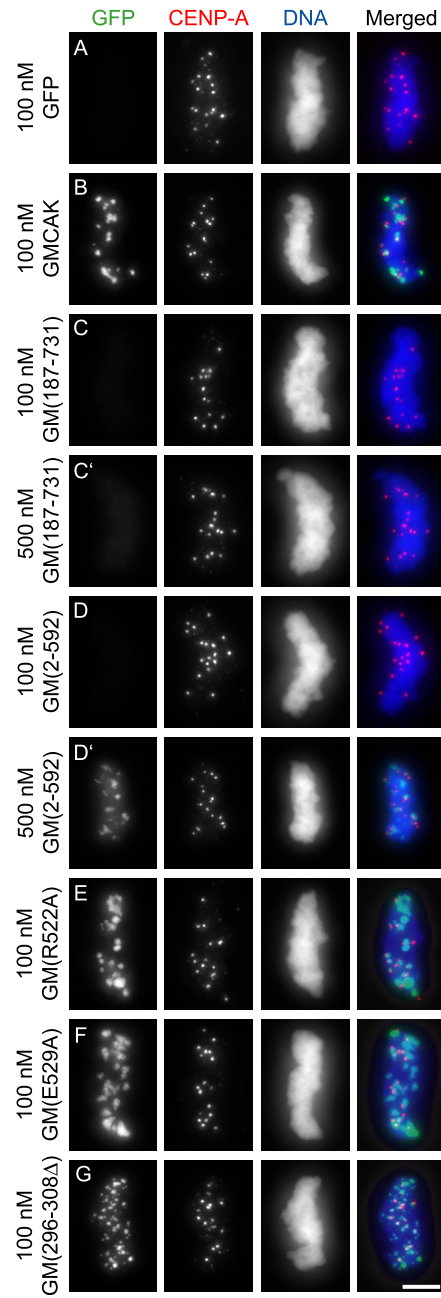

Supplement: mbc_E06-08-0724_5.pdf [file mbc_E06-08-0724_5.pdf]
